# Supplementary material for: Evolutionary innovation using EDGE, a system for localized elevated mutagenesis
Source: PubMed Central journal article supplement (PMC7192385; doi:10.1371/journal.pone.0232330), 2020-04-30
Supplement: pone.0232330.s002.pdf [file pone.0232330.s002.pdf]

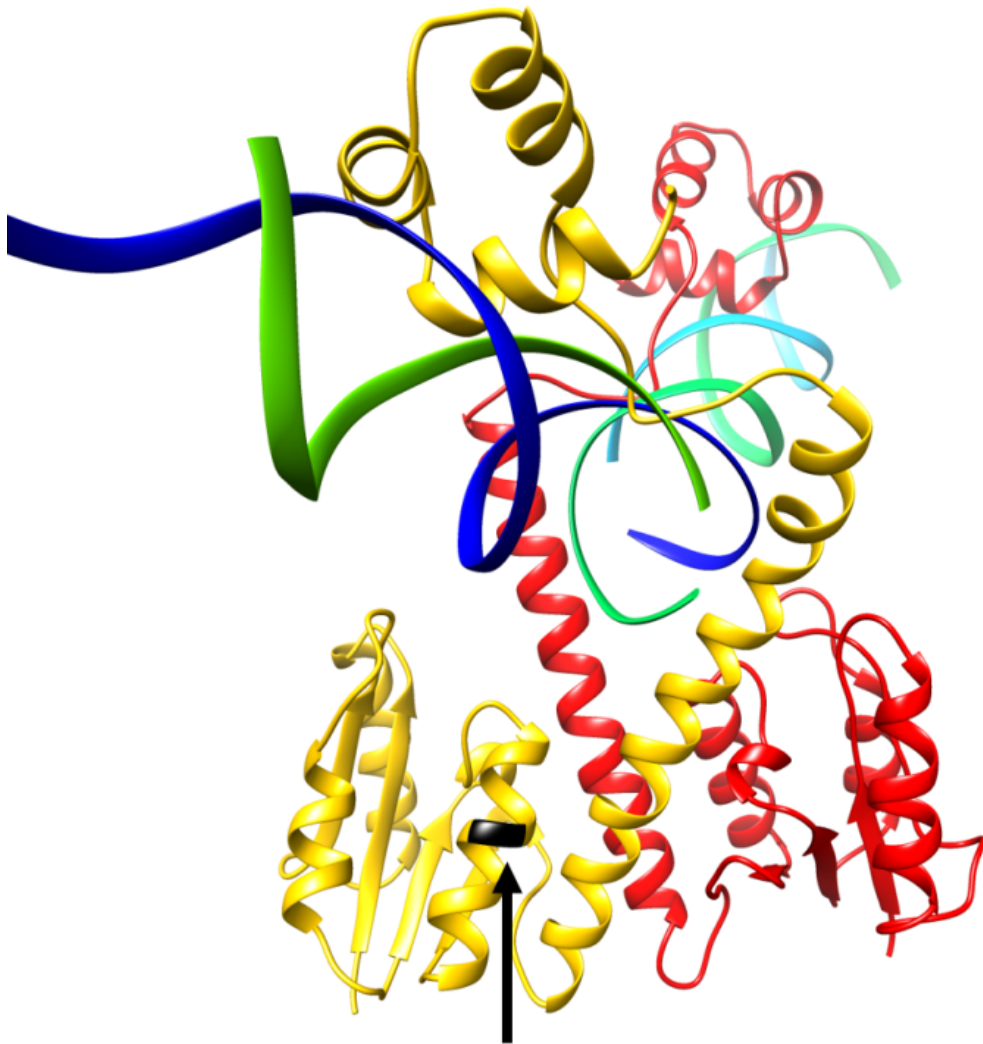

---

**Substitution of alanine with proline**
