# Supplementary material for: Evolutionary innovation using EDGE, a system for localized elevated mutagenesis
Source: PubMed Central journal article supplement (PMC7192385; doi:10.1371/journal.pone.0232330), 2020-04-30
Supplement: pone.0232330.s003.pdf [file pone.0232330.s003.pdf]

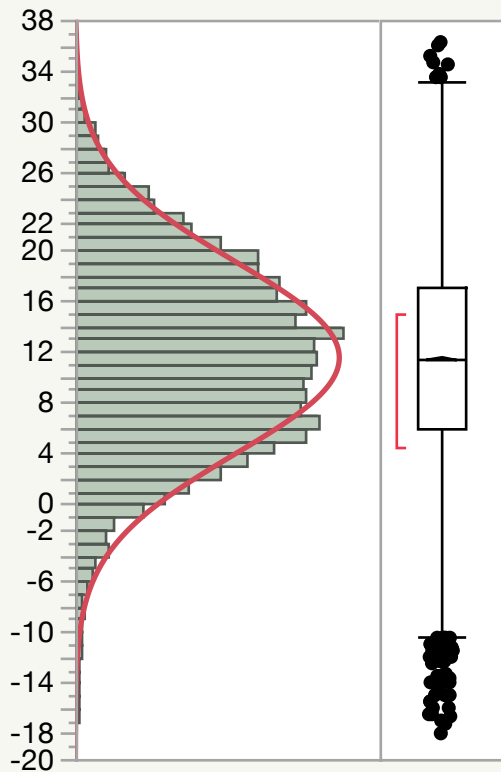

|        |          |              |
|--------|----------|--------------|
| 100.0% | maximum  | 36.25        |
| 99.5%  |          | 29.75        |
| 97.5%  |          | 25.833333333 |
| 90.0%  |          | 21.333333333 |
| 75.0%  | quartile | 16.96875     |
| 50.0%  | median   | 11.5         |
| 25.0%  | quartile | 6            |
| 10.0%  |          | 2            |
| 2.5%   |          | -3           |
| 0.5%   |          | -10          |
| 0.0%   | minimum  | -18          |

N

10000
