# Supplementary material for: Evolutionary innovation using EDGE, a system for localized elevated mutagenesis
Source: PubMed Central journal article supplement (PMC7192385; doi:10.1371/journal.pone.0232330), 2020-04-30

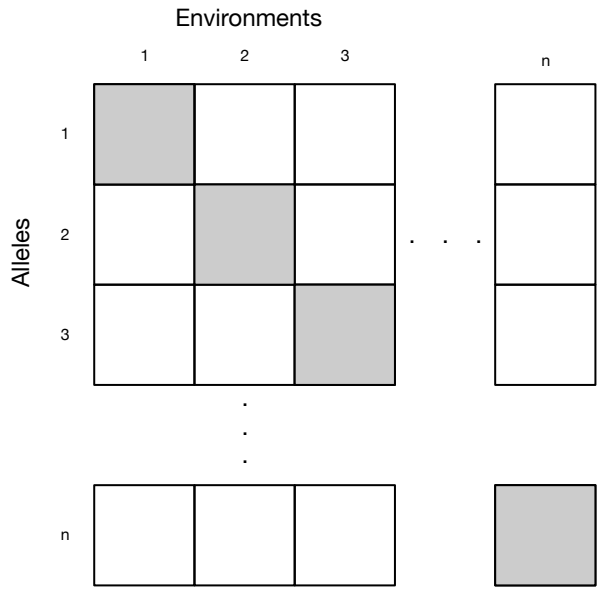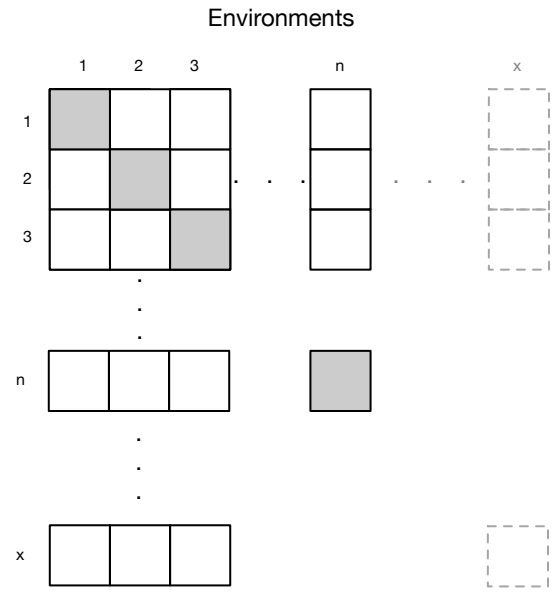

Supplement: pone.0232330.s004.pdf [file pone.0232330.s004.pdf]
