# Supplementary material for: Evolutionary innovation using EDGE, a system for localized elevated mutagenesis
Source: PubMed Central journal article supplement (PMC7192385; doi:10.1371/journal.pone.0232330), 2020-04-30
Supplement: pone.0232330.s005.pdf [file pone.0232330.s005.pdf]

Table S1. Hin recombinase genotypes obtained by selection for increased mutation

| rate | Mutant Index | Mutations    |
|------|--------------|--------------|
|      | 1            | wildtype     |
|      | 2            | R8G          |
|      | 3            | K39M         |
|      | 4            | A143V, L176I |
|      | 5            | A76P         |
